# Supplementary material for: Vertical strain and electric field tunable band alignment in type-II ZnO/MoSSe van der Waals heterostructures
Source: Royal Society of Chemistry journal article supplement (doi:10.1039/d0cp05354f), 2020-12-10
Supplement: d0cp05354f1.pdf [file d0cp05354f1.pdf]

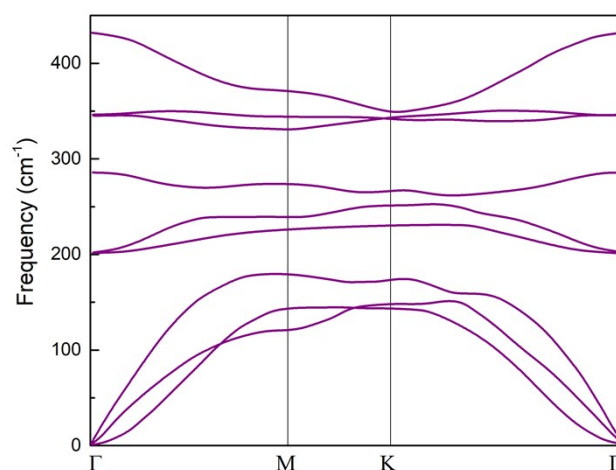

Fig. S1 Phonon band structure of MoSSe monolayer.

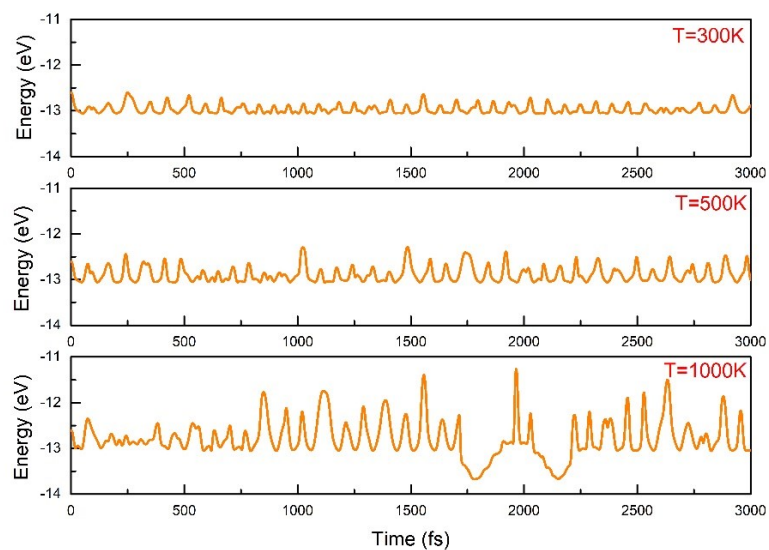

Fig. S2 The energy of MoSSe as a function of the AIMD time at 300 K, 500 K and 1000K.

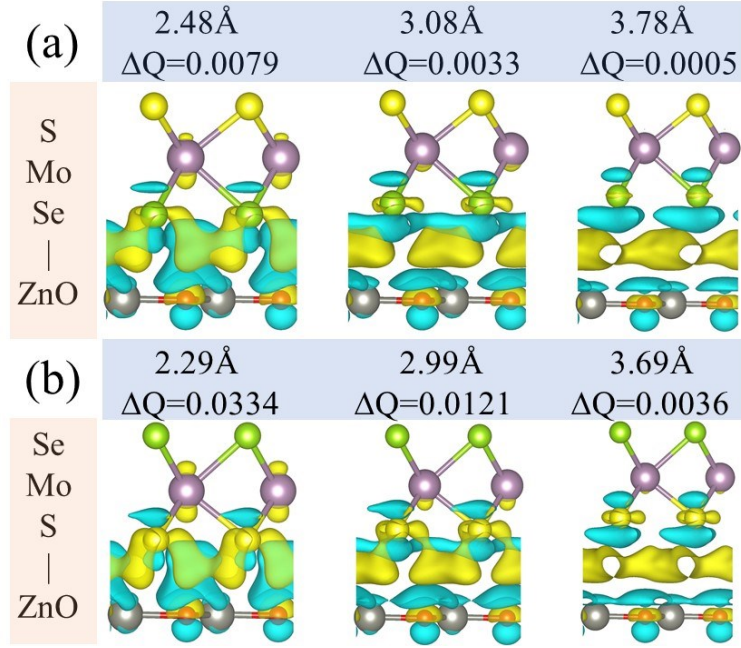

Fig. S3. The three-dimensional (3D) isosurface CDD and charge transfer  $\Delta Q$  of (a) ZnO-SeMoS and (b) ZnO-SMoSe vdWHs under different interlayer distance. The isosurface values are  $5.20 \times 10^{-4}$  ( $6.21 \times 10^{-4}$ ),  $1.96 \times 10^{-4}$  ( $1.90 \times 10^{-4}$ ) and  $6.27 \times 10^{-5}$  ( $5.8 \times 10^{-5}$ )  $\text{e}\text{\AA}^{-3}$  for ZnO-SeMoS (ZnO-SMoSe) at the interlayer distance of 2.48(2.29), 3.08(2.99) and 3.78(3.69) Å, respectively.

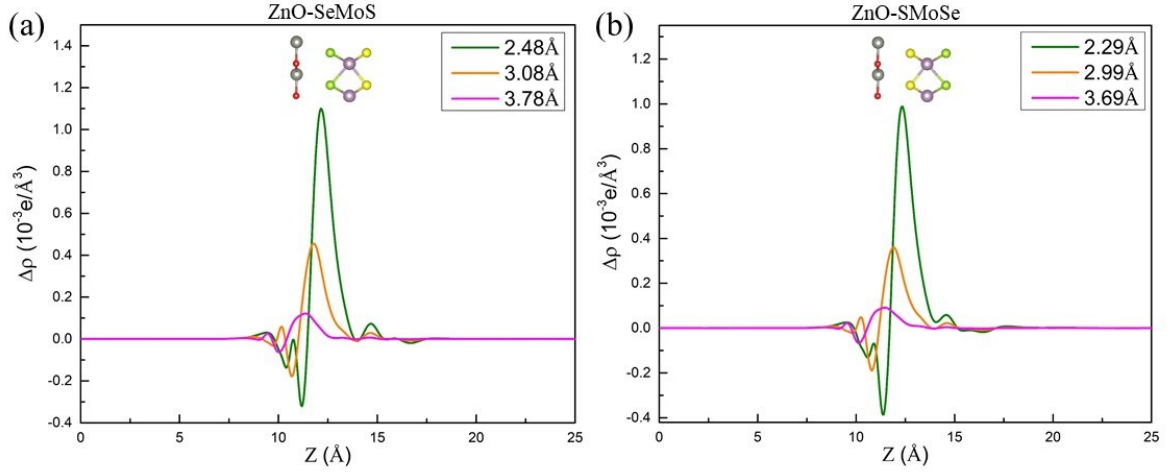

Fig. S4. The plane-averaged CDD of (a) ZnO-SeMoS and (b) ZnO-SMoSe vdWHs under different interlayer distance.
